# Supplementary material
Source: PubMed Central journal article supplement (PMC6500731)
Supplement: NIHMS971170-supplement-1.pdf [file NIHMS971170-supplement-1.pdf]

Figure S1

A

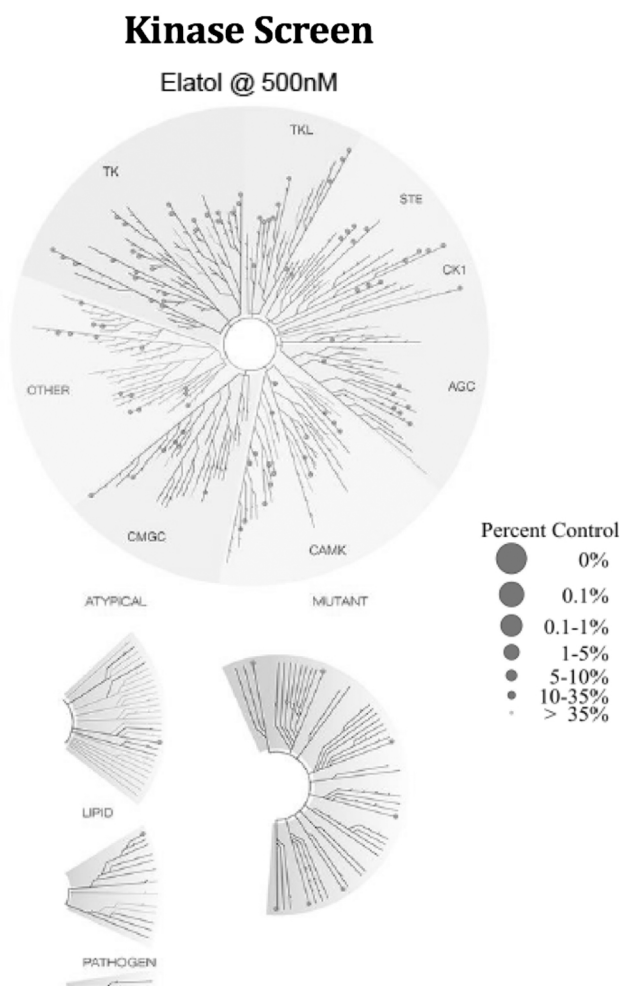

B

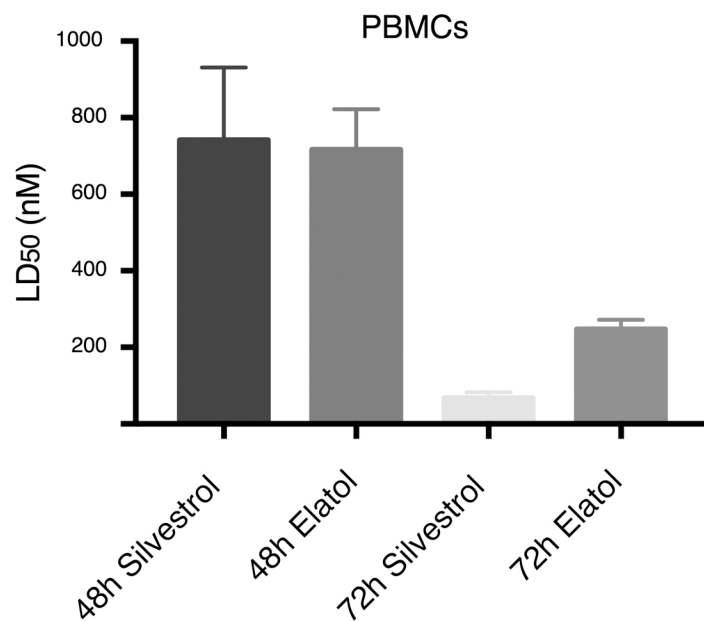

Figure S1. A) Elatol was submitted to a 96-member kinome screen (LeadHunter, DiscoverRx) to evaluate specificity. Inhibition of any of the kinases would be indicated by a dot, corresponding to percent inhibition relative to a positive control. B) Sensitivity of normal human peripheral blood mononuclear cells (PBMCs) isolated using hisptopaque-1077 (Sigma) from normal healthy donors. Viability measured after 72-hour treatment using Promega Cell Titer Glo reagent. LD50 calculated using nonlinear regression fit analysis in Graphpad Prism 7. Mean + SEM n=4.

A

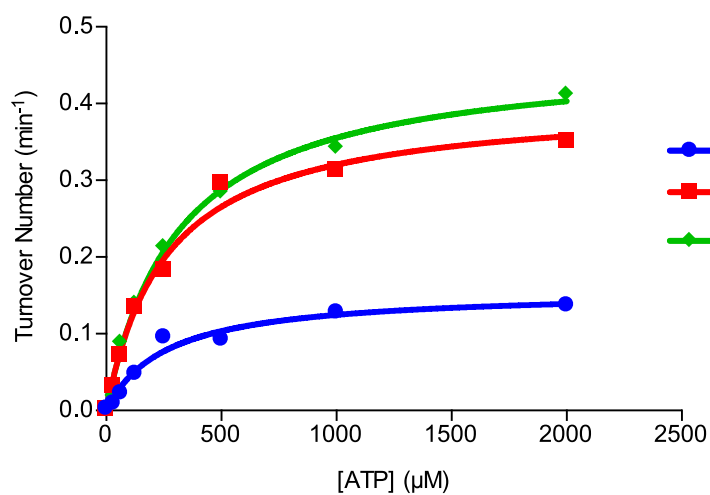

|              | $K_M$ ( $\mu\text{M}$ ) | $K_{cat}$ ( $\text{min}^{-1}$ ) | $K_{cat}/K_M$ |
|--------------|-------------------------|---------------------------------|---------------|
| eIF4A1 WT    | 258                     | 0.157                           | 0.000608      |
| eIF4A1 K82R  | 261                     | 0.404                           | 0.00155       |
| eIF4A1 K238E | 310                     | 0.465                           | 0.00150       |

B

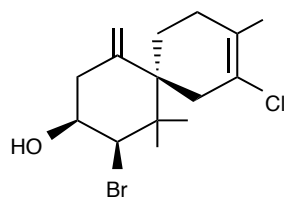

Elatol

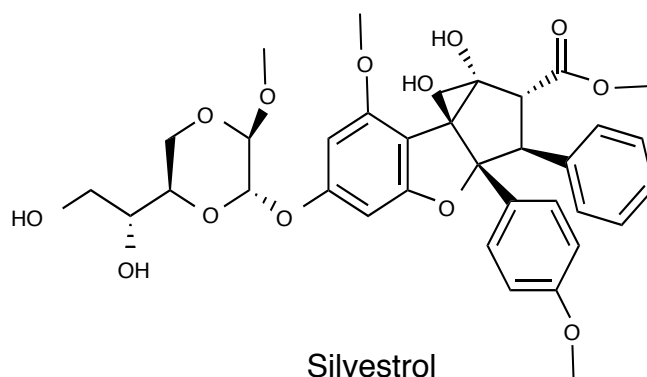

Silvestrol

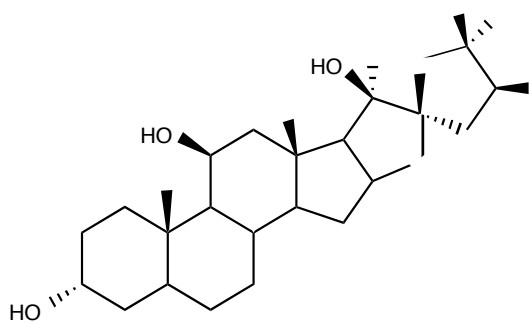

Hippuristanol

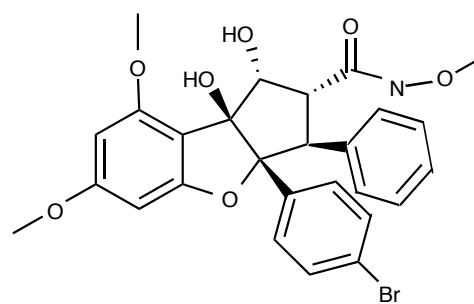

Rocaglate

Figure S2. A) Michaelis-Menten curves of eIF4A1 wild type (blue), K82R (red), and K238E (green). Michaelis-Menten constants for eIF4A1 wild type and mutants in table on the left. B) Chemical structures of elatol and three other known eIF4A inhibitors.

# Figure S3

**A**

Carboplatin Viability

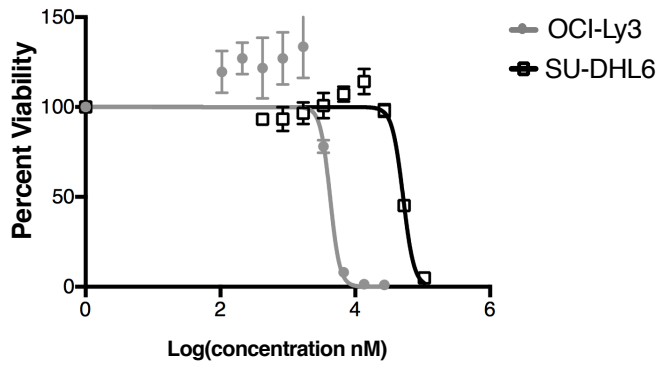

**B**

RIVA

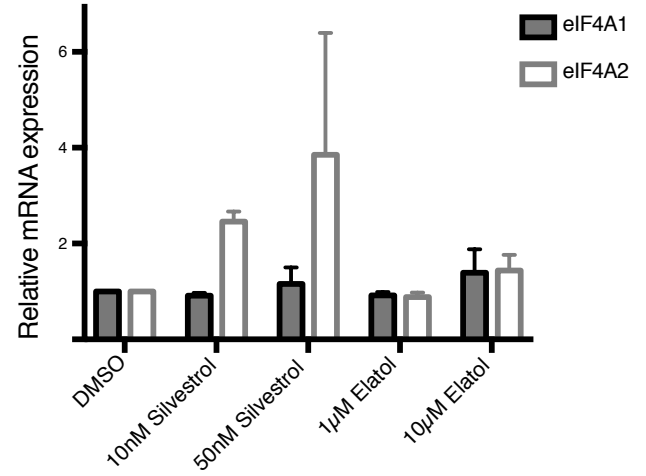

**C**

mRNA expression of translation targets

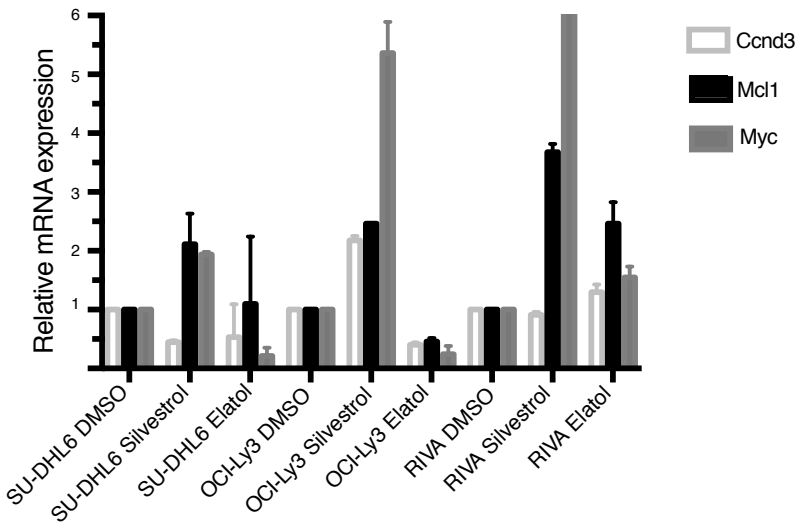

OCI-Ly3

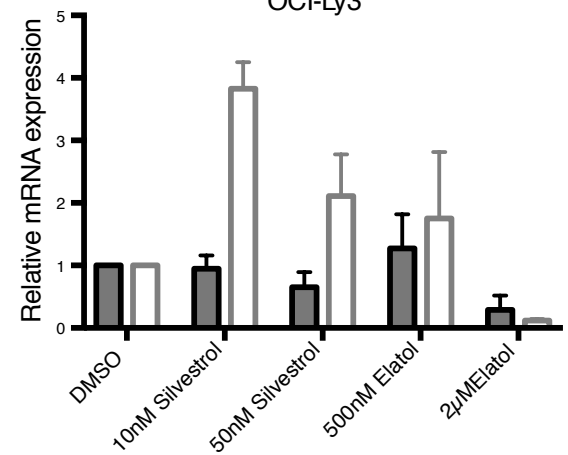

**D**

OCI-Ly3

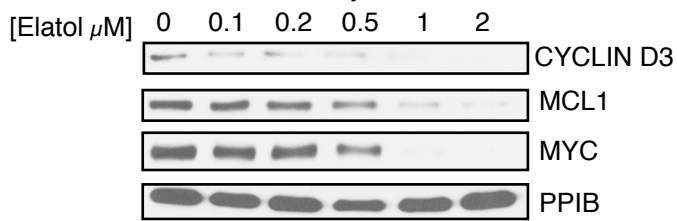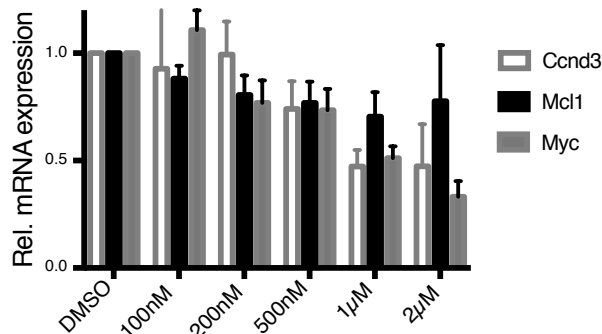

SU-DHL-6

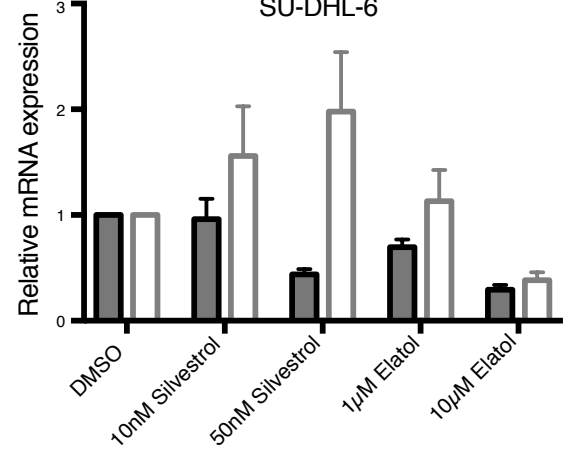

Figure S3. A) Cell viability following 72h carboplatin treatment measured using Cell Titer Glo. Nonlinear regression fit analysis in Graphpad Prism 7. Mean  $\pm$  SEM N=4. B) Relative mRNA expression of eIF4A1 and eIF4A2 following 24 hour treatment with silvestrol or elatol. Expression calculated using the double delta CT method normalized to DMSO. Mean  $\pm$  SEM, n=3 C) Relative mRNA expression of translationally regulated targets following 24 hour treatment with silvestrol or elatol. Expression calculated using the double delta CT method normalized to DMSO treated cells. Mean  $\pm$  SEM, n=3 D) Protein and relative mRNA expression in OCI-Ly3 cells treated with the indicated concentration of elatol for 24 hours. Expression calculated using the double delta CT method normalized to DMSO. Mean  $\pm$  SEM, n=3.

# Figure S4

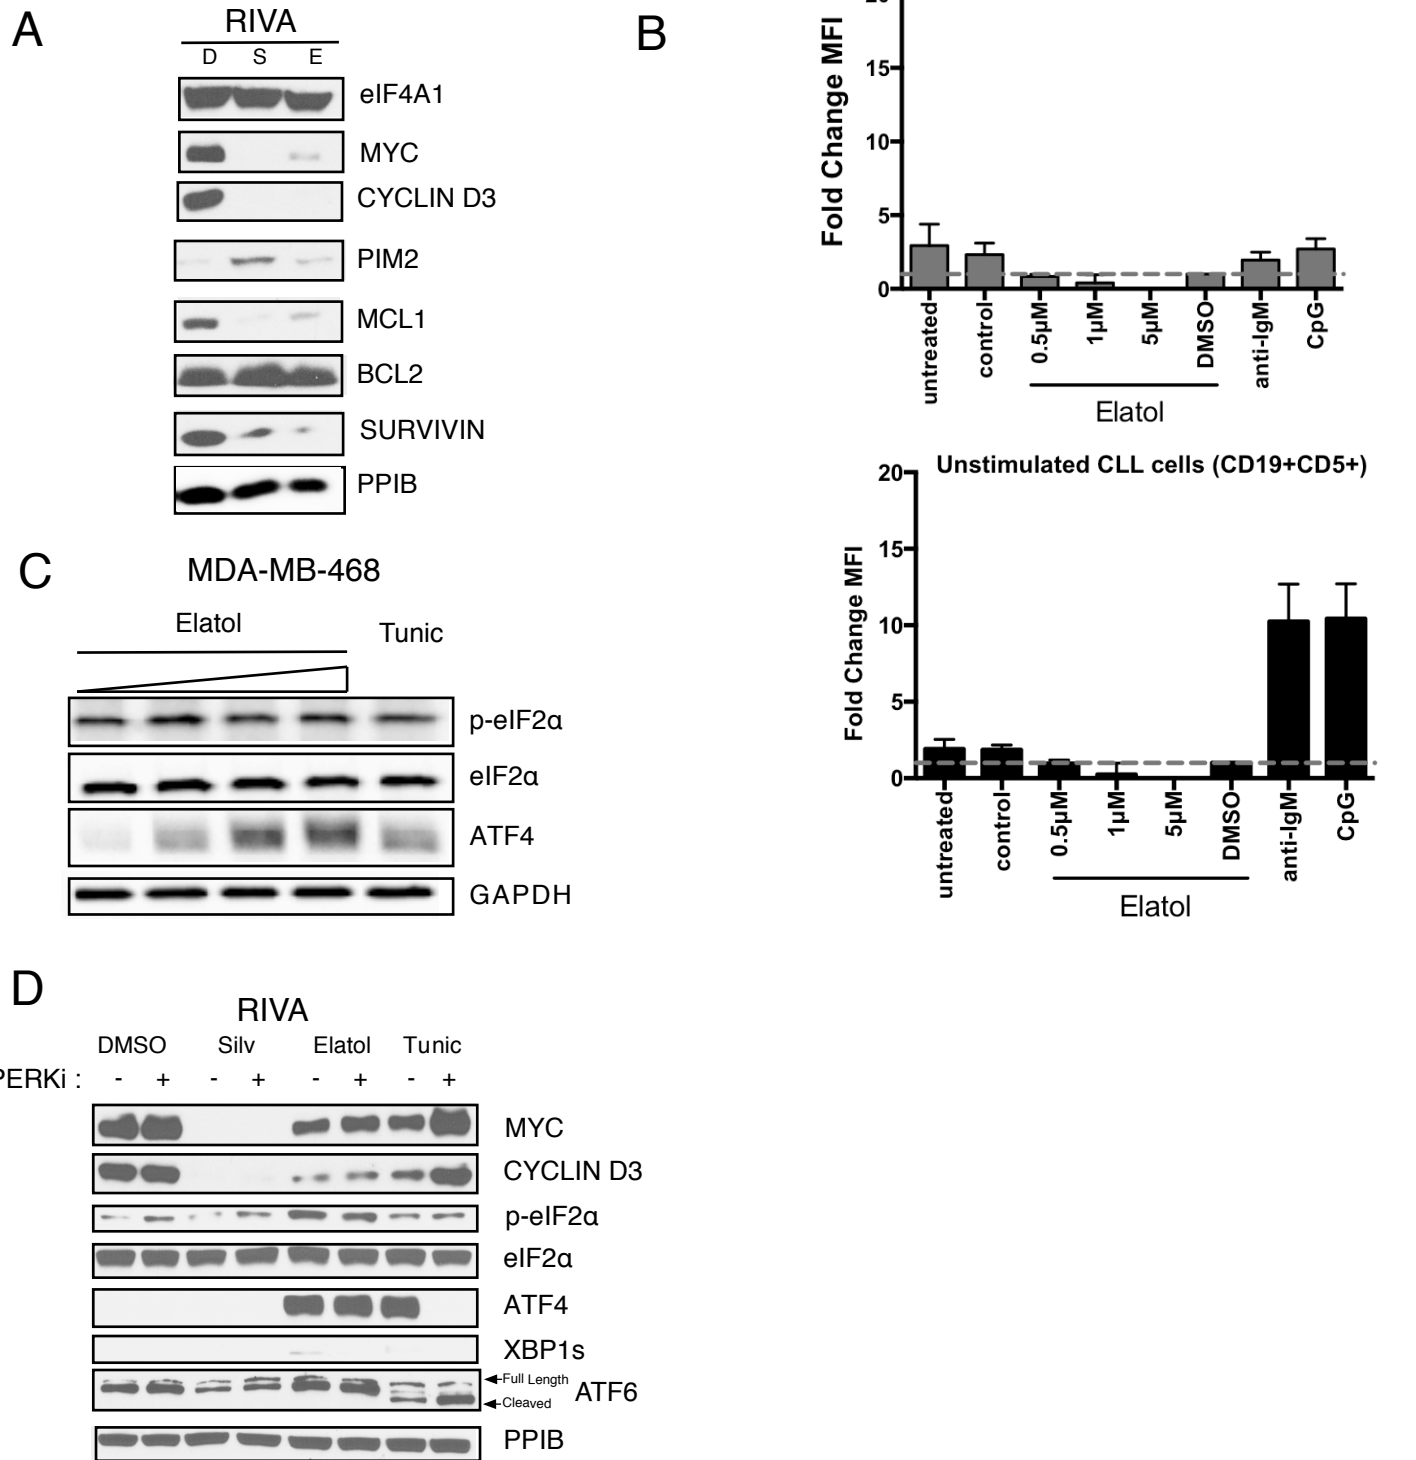

Figure S4. A) Western blot showing protein expression of translationally regulated genes in RIVA cells treated with DMSO (D), 50nM silvestrol (S) or 5 μM elatol for 16h. Representative images, n=3. B) Basal translation measured by OPP incorporation in CD19+CD5+ CLL patient cells (left) and non-malignant CD19-CD5+ T-cells from the same patient samples (right) following elatol treatment. Anti-Ig-M and CpG-ODN stimulation used as a positive control. Mean fluorescent intensity normalized to DMSO treated cells. Mean + SEM n=4. \* = p< 0.01, \*\* = p<0.001. C) Protein expression in MDA-MB-468 cells treated with DMSO (far left), 500nM, 2.5 μ M, 10 μ M elatol or 10 μ M tunicamycin (far right) for six hours. D) Western blot showing protein expression in RIVA cells treated for four hours with DMSO, 100nM silvestrol, 5 μM elatol or 5 μM tunicamycin with or without the combination of 1 μM PERKi. Representative images. n=3.

# Figure S5

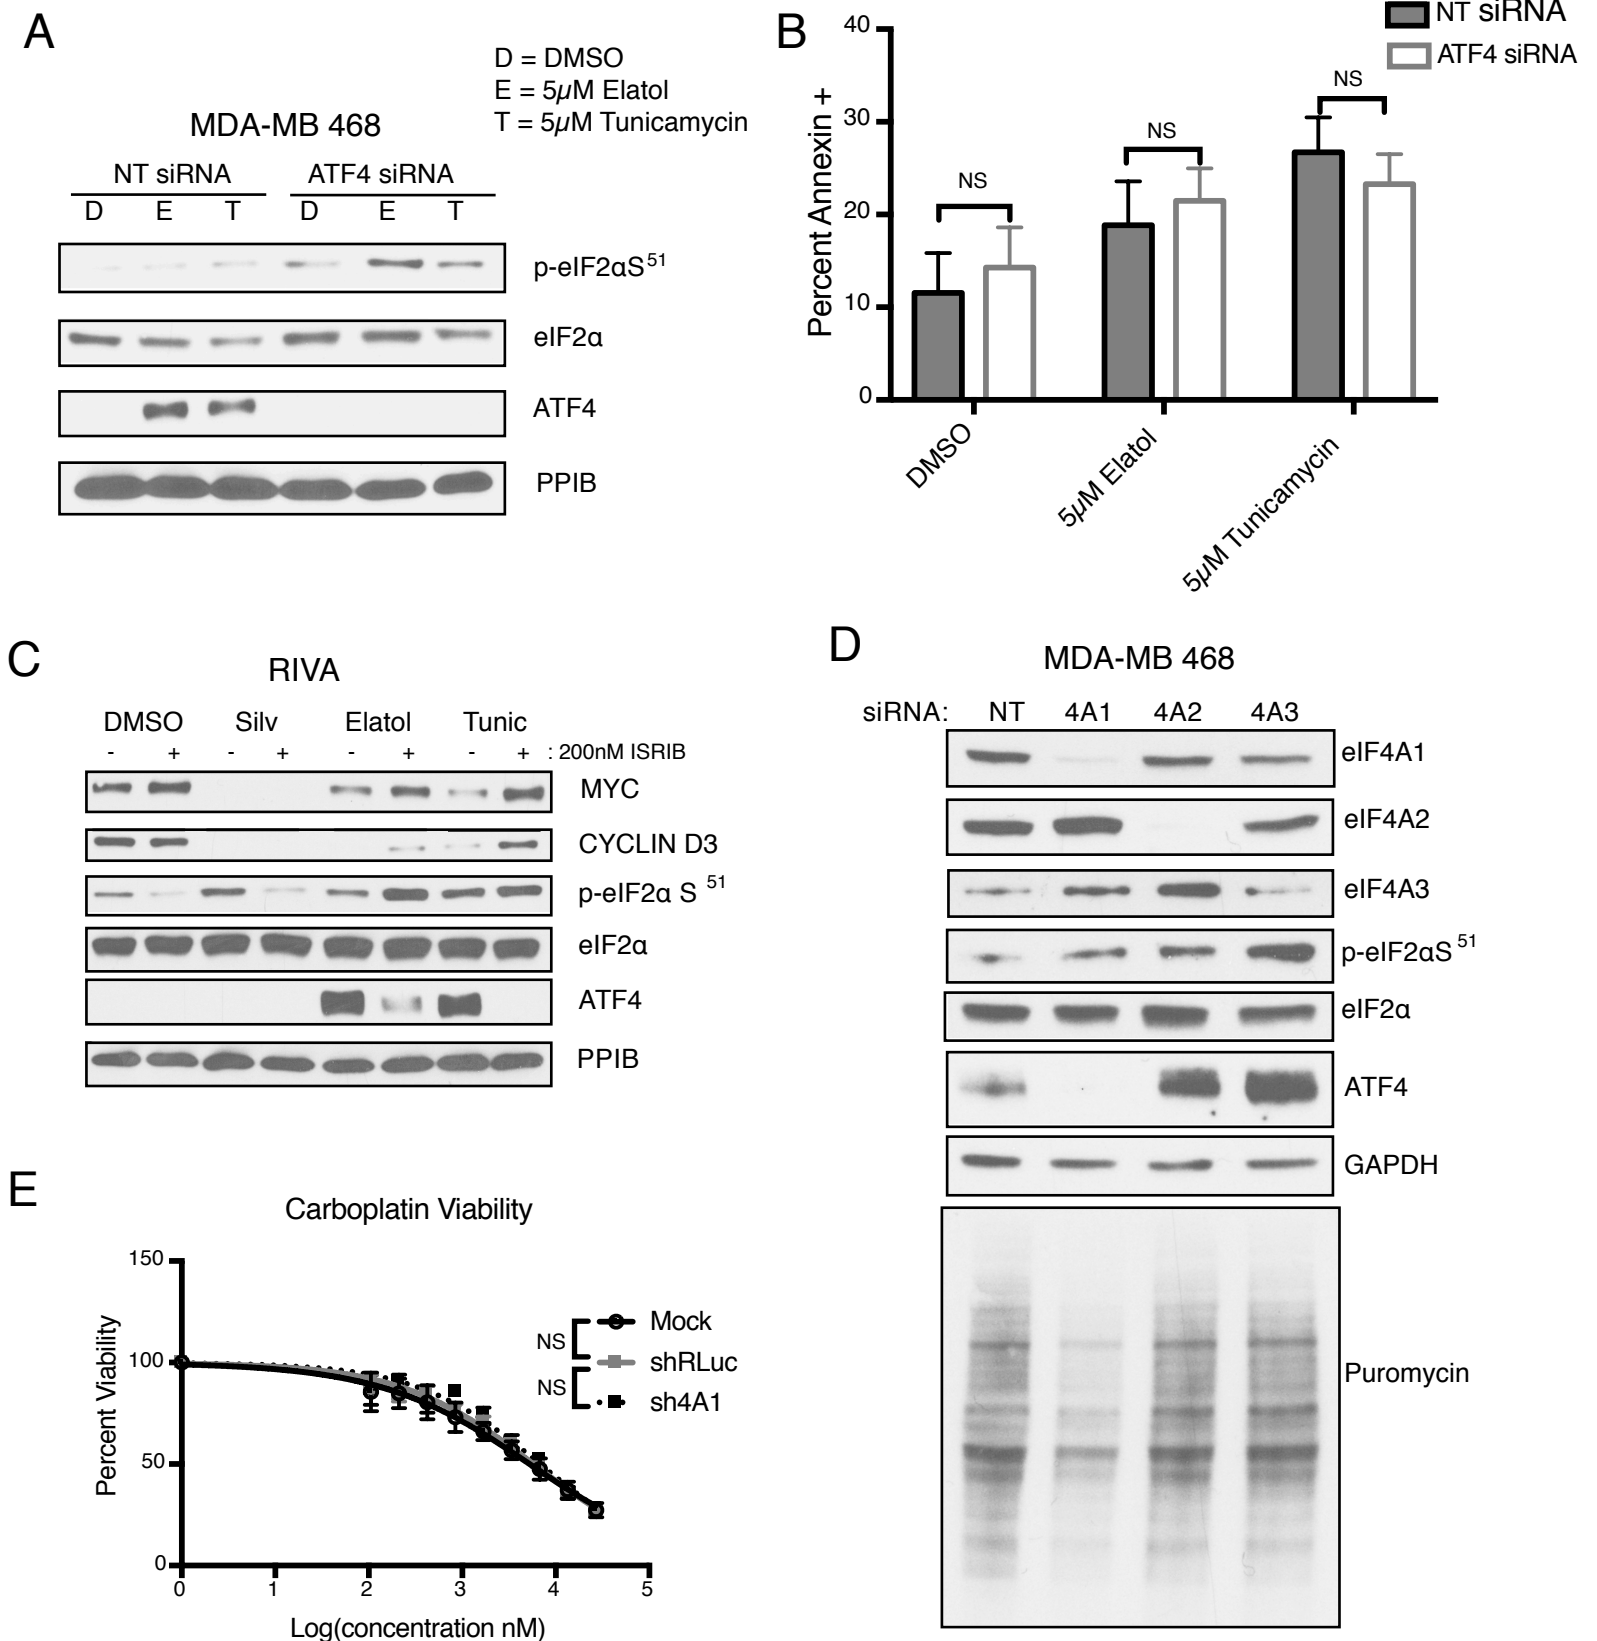

Figure S5. A) Western blot analysis of MDA-MB-468 breast cancer cells transfected with 50nM ATF4 siRNA or a non-targeting control (NT). 48 hours after transfection cells were treated with DMSO, 5  $\mu$ M elatol or 5  $\mu$ M tunicamycin for 8 hours and samples were collected for analysis. Representative images, n=2. B) MDA-MB-468 cells were transfected with 50nM ATF4 siRNA or NT control for 48 hours and then treated with DMSO, 5  $\mu$ M elatol or 5  $\mu$ M tunicamycin for 24 hours. Then cell death was measured by flow cytometry following annexin V staining. Mean  $\pm$  SEM n=3. C) Protein expression in RIVA cells treated for four hours with DMSO, 100nM silvestrol, 5  $\mu$ M elatol or 5  $\mu$ M tunicamycin with or without the combination of 200nM ISRIB. Representative images. N=3. D) Western blot analysis of MDA-MB-468 cells transfected with siRNA targeting eIF4A1, eIF4A2, eIF4A3 or a non-targeting control (NT). Cells were pulsed with 10mM puromycin for 30 minutes prior to lysis for detection of global translation by puromycin incorporation. E) 5 day viability of NIH-3T3 cells stably expressing shRNA targeting control (RLuc) or eIF4A1 treated with carboplatin measured using Cell Titer-Glo. Nonlinear regression fit analysis in Graphpad Prism 7. Mean  $\pm$  SEM n=4.

# Figure S6

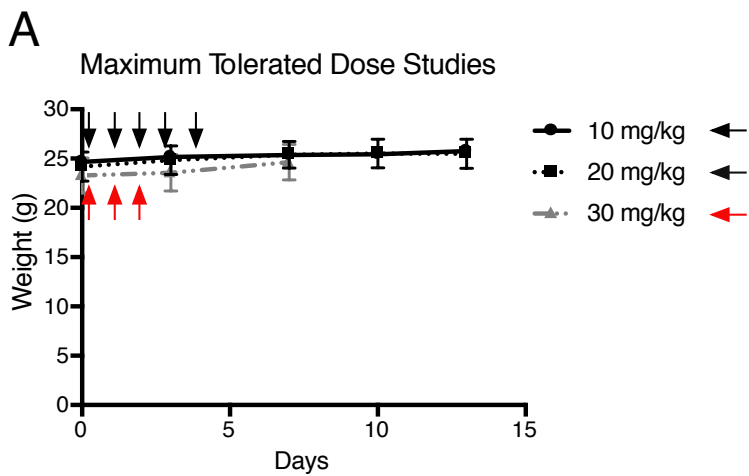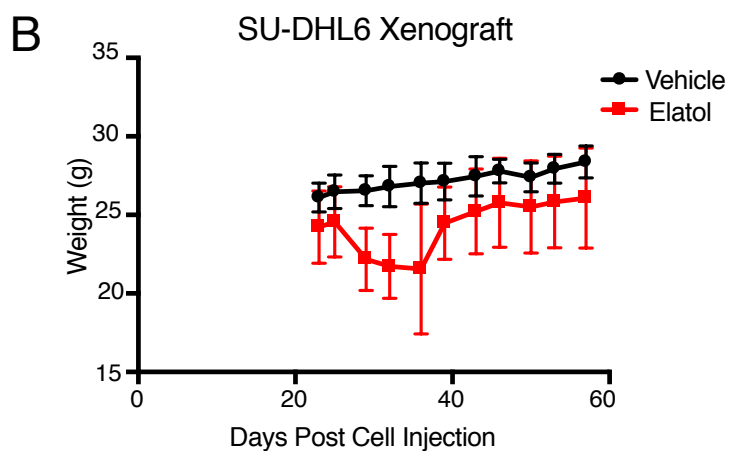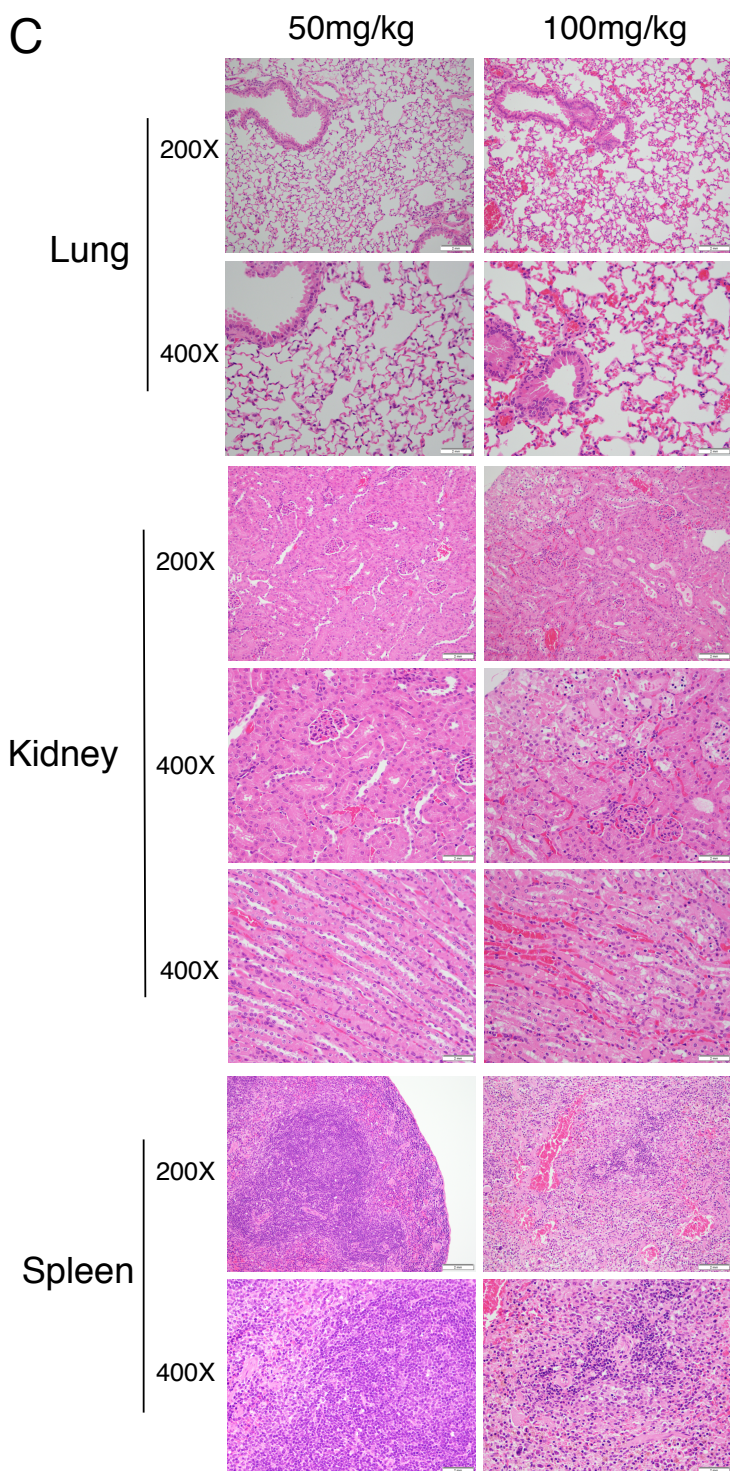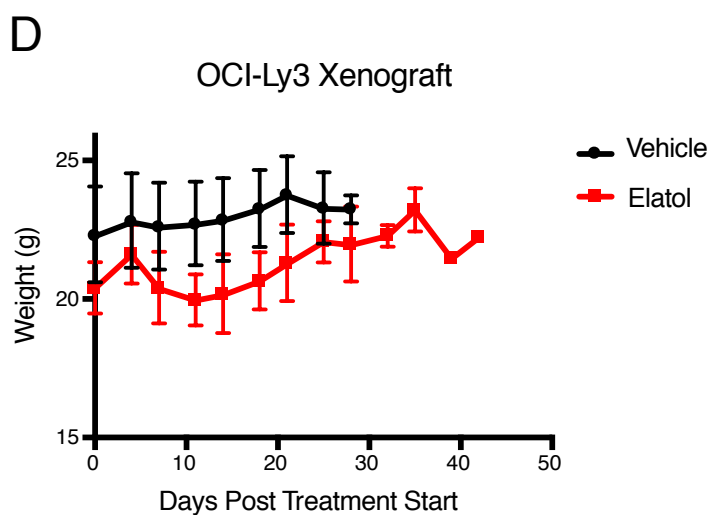

Figure S6. A) Mouse weights measured twice weekly during first maximum tolerated dose study. Mean  $\pm$  SEM, n=5. B) Mouse weights measured twice weekly during SU-DHL6 xenograft study. Mean  $\pm$  SEM, n=8. C) H&E staining of the lung, kidney and spleen of non-tumor bearing CD1 mice treated with 50 or 100mg/kg elatol. Representative images n=5. D) Mouse Weights from OCI-Ly3 xenograft experiment. Mean  $\pm$  SEM, n=8.
